# Supplementary material for: MicroRNAs dysregulated in breast cancer preferentially target key oncogenic pathways
Source: Royal Society of Chemistry journal article supplement (doi:10.1039/c1mb05181d), 2011-07-18
Supplement: c1mb05181d.pdf [file c1mb05181d.pdf]

**Table S1 - Pathways targeted by individual up-regulated miRNAs**

| KEGG Pathway                     | Expected | Actual | P-value  |
|----------------------------------|----------|--------|----------|
| hsa-miR-142-5p                   |          |        |          |
| Ribosome                         | 1        | 4      | 4.46E-02 |
| TGF-beta signaling pathway       | 1        | 6      | 6.55E-03 |
| hsa-miR-155                      |          |        |          |
| Ubiquitin mediated proteolysis   | 1        | 4      | 5.90E-03 |
| Glutamate metabolism             | 0        | 3      | 8.68E-04 |
| hsa-miR-183                      |          |        |          |
| Regulation of actin cytoskeleton | 1        | 5      | 1.95E-02 |
| Long-term depression             | 0        | 3      | 1.72E-02 |
| hsa-miR-203                      |          |        |          |
| Focal adhesion                   | 2        | 7      | 3.35E-02 |
| Insulin signaling pathway        | 2        | 6      | 1.72E-02 |
| hsa-miR-21                       |          |        |          |
| Acute myeloid leukemia           | 1        | 3      | 3.53E-02 |
| hsa-miR-25                       |          |        |          |
| Regulation of actin cytoskeleton | 2        | 5      | 4.11E-02 |
| hsa-miR-27a                      |          |        |          |
| Glutamate metabolism             | 0        | 3      | 7.63E-03 |

**Table S2 - Pathways targeted by individual down-regulated miRNAs**

| KEGG Pathway                          | Expected | Actual | P-value  |
|---------------------------------------|----------|--------|----------|
| hsa-miR-497                           |          |        |          |
| MAPK signaling pathway                | 4        | 9      | 2.92E-02 |
| Prostate cancer                       | 2        | 5      | 1.96E-02 |
| Renal cell carcinoma                  | 1        | 5      | 1.64E-02 |
| Regulation of actin cytoskeleton      | 3        | 8      | 3.17E-02 |
| hsa-miR-663                           |          |        |          |
| Non-small cell lung cancer            | 0        | 4      | 4.16E-02 |
| Phosphatidylinositol signaling system | 1        | 4      | 5.82E-03 |
| Chronic myeloid leukemia              | 1        | 4      | 8.52E-03 |
| Inositol phosphate metabolism         | 0        | 4      | 6.53E-04 |
